# Supplementary material
Source: PubMed Central journal article supplement (PMC3249065)
Supplement: supp_M111.294009_jbc.M111.294009-1.pdf [file supp_M111.294009_jbc.M111.294009-1.pdf]

Supplementary Figure 1

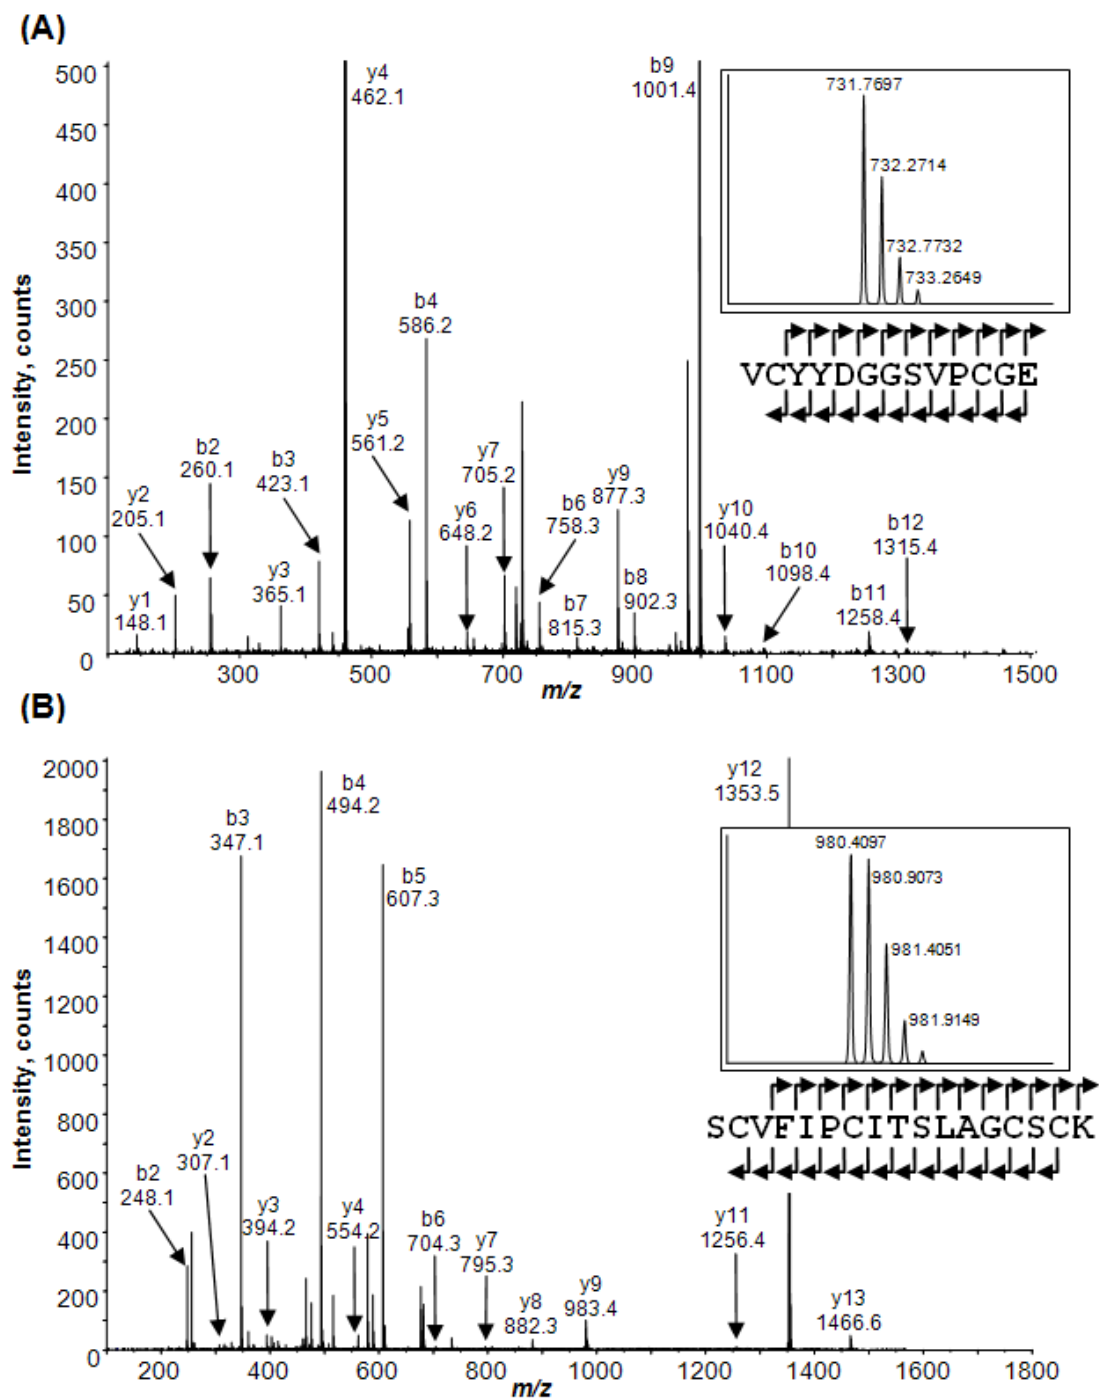

Supplementary Fig. 1. LC-ESI-MS/MS sequencing of paragidin-br1. A combined trypsin and endoproteinase Glu-C digest was performed. (A) MS/MS of precursor at  $m/z$  731.8 (1461.5 Da). (B) MS/MS of precursor at  $m/z$  980.4 (1958.8 Da). The insets show the precursor ion  $m/z$  values and the schematics show the sequence ions detected (indicated by arrows). Major sequence ions are labelled in the spectra.
