# Supplementary material
Source: PubMed Central journal article supplement (PMC3249065)
Supplement: supp_M111.294009_jbc.M111.294009-2.pdf [file supp_M111.294009_jbc.M111.294009-2.pdf]

Supplementary Figure 2

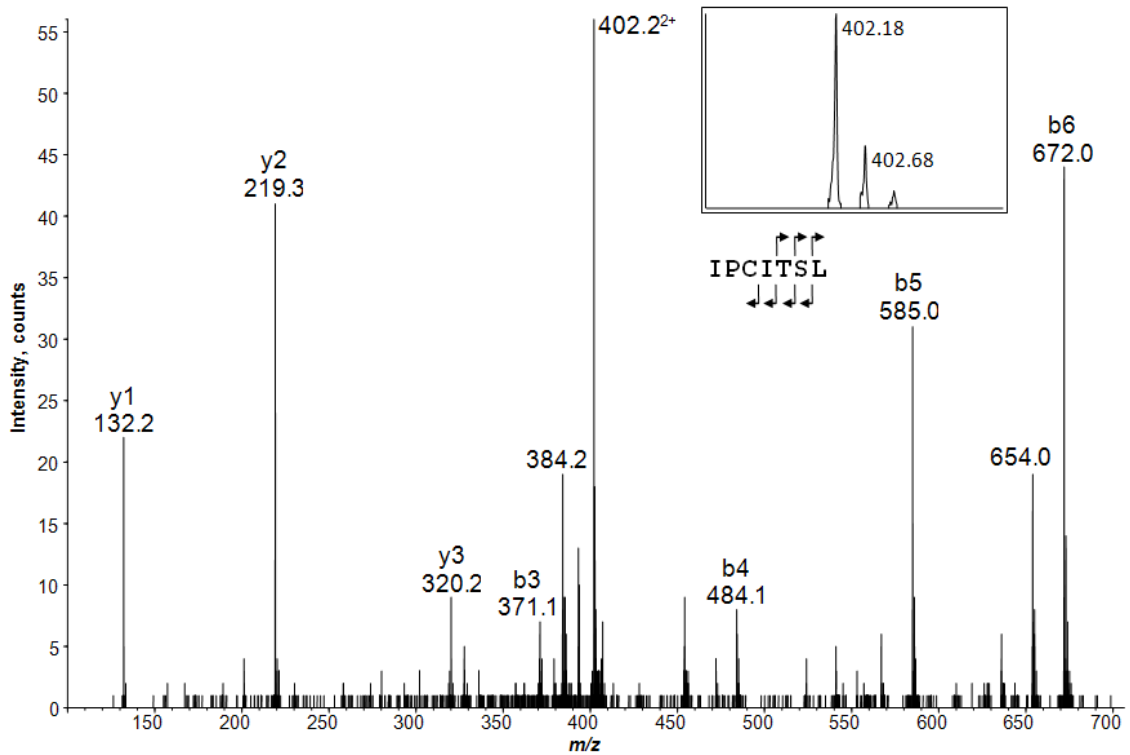

Supplementary Fig. 2. LC-ESI-MS/MS sequencing of paragin-br1. A chymotrypsin digest was performed in order to elucidate the position of the isobaric amino acids Ile and Leu within the peptide sequence. MS/MS of precursor at  $m/z$  402.2 (802.4 Da). The inset shows the precursor ion  $m/z$  value and the schematic shows the sequence ions that were detected (indicated by arrows). The major sequence ions are labeled in the spectrum.
